# Supplementary material
Source: Elsevier journal article supplement (https://www.sciencedirect.com/science/article/pii/S2013524620300337)
Supplement: mmc1 [file S2013524620300337:mmc1.doc]

**ANEXO I: Escala FNQ o índice de Kreutzer**

¿En qué medida son importantes estas necesidades para usted?

| **NECESIDAD DE INFORMACIÓN** | **No es importante** | **Un poco importante** | **Bastante importante** | **Muy importante** |
| --- | --- | --- | --- | --- |
| Comprobar que el personal médico respeta las necesidades o deseos del paciente |  |  |  |  |
| Proporcionar información sobre el proceso de la enfermedad |  |  |  |  |
| Tener información sobre medicamentos y tratamientos |  |  |  |  |
| Tener información sobre los problemas físicos del paciente |  |  |  |  |
| Garantía de que se le da al paciente la mejor atención médica posible. |  |  |  |  |
| Estar informado sobre los cambios que se producen en su proceso de enfermedad |  |  |  |  |
| Estar informado sobre los exámenes y resultados del laboratorio. |  |  |  |  |
| Información y explicaciones en términos que pueda comprender |  |  |  |  |
| Respuesta a mis preguntas con sinceridad |  |  |  |  |
| Disponer de información completa sobre problemas mentales del paciente (memoria o comunicación) |  |  |  |  |
| Que los profesionales sepan comunicarse con el paciente |  |  |  |  |
| Tener información sobre la muerte, cuando la enfermedad del paciente llegue al final. |  |  |  |  |
| **NECESIDAD DE APOYO EMOCIONAL** | **No es importante** | **Un poco importante** | **Bastante importante** | **Muy importante** |
| Tengo necesidad que mi pareja o amigos entiendan lo difícil que es para mí |  |  |  |  |
| Hablar de mis sentimientos, sobre el paciente con alguien que haya pasado por la misma experiencia |  |  |  |  |
| Ayuda para superar mis dudas y miedos sobre el futuro del paciente |  |  |  |  |
| Tener tiempo para gimnasio, paseo, ver amigos |  |  |  |  |
| Que se me anime a pedir ayuda a otros |  |  |  |  |
| Discutir mis sentimientos sobre el paciente con un profesional (sentimiento de culpa, triste, enojado, etc.) |  |  |  |  |
| Que me tranquilicen, en el sentido que es normal tener sentimientos negativos respecto al paciente |  |  |  |  |
| Ayuda a mantener la esperanza en el futuro |  |  |  |  |
| **NECESIDAD DE APOYO INSTRUMENTAL** | **No es importante** | **Un poco importante** | **Bastante importante** | **Muy importante** |
| Disponer de ayuda para realizar las tareas de la casa (hacer compras, limpieza) |  |  |  |  |
| Disponer de ayuda de otros cuidadores |  |  |  |  |
| Dormir y descansar lo suficiente |  |  |  |  |
| Hacer planes con mi entorno social y familiar sin sentimiento de culpa |  |  |  |  |
| Prestar atención a mis propias necesidades, trabajo e intereses |  |  |  |  |
| Orientación financiera, beneficios por discapacidad, atención a subsidios de bajo ingresos etc. |  |  |  |  |
| Tener información sobre el cuidado en el hogar (por Ej. movilización y ejercicios en el hogar, cuidado diurno , cuidado de relevo) |  |  |  |  |
| Para tener información sobre dispositivos de asistencia (camas eléctricas, sillas de ruedas, bi-pap, aspiradores) |  |  |  |  |
| Información sobre el cuidado a largo plazo de los pacientes (por ej. centros de día, residencias etc.) |  |  |  |  |
| **NECESIDAD DE APOYO PROFESIONAL** | **No es importante** | **Un poco importante** | **Bastante importante** | **Muy importante** |
| Estar informado de cómo manejar las emergencias médicas del paciente |  |  |  |  |
| Tener información en programas de terapia ocupacional, rehabilitación |  |  |  |  |
| Que se me indique que hacer cuando el paciente se enoja o actúa de una forma extraña |  |  |  |  |
| Contar con ayuda para decidir en qué medida, hay que dejar al paciente valerse por sí mismo |  |  |  |  |
| **NECESIDAD DE APOYO COMUNITARIO** | **No es importante** | **Un poco importante** | **Bastante importante** | **Muy importante** |
| Disponer de un profesional al que pueda recurrir, para pedirle consejo o servicios cuando el paciente necesite ayuda |  |  |  |  |
| Asesoría en el transporte |  |  |  |  |
| Tener apoyo de familiares y amigos |  |  |  |  |
| Discutir mis sentimientos sobre el cuidado del paciente con otros amigos o familiares |  |  |  |  |
| **NECESIDAD DE IMPLIACIÓN EN EL TRATAMIENTO Y CUIDADO** | **No es importante** | **Un poco importante** | **Bastante importante** | **Muy importante** |
| Ayudas técnicas en cuidados básicos ( aseo y baño) |  |  |  |  |
| Cuidados en la nutrición, dificultad para tragar |  |  |  |  |
| Aprender técnicas en la movilización, estiramiento, ejercicios |  |  |  |  |
| Manejo de sondas de gastrostomía, nutrición enteral, oxígeno, bi-pap |  |  |  |  |
| Cuidado de piel y heridas |  |  |  |  |
